# Supplementary material for: Single cell atlas of human gastric muscle immune cells and macrophage-driven changes in idiopathic gastroparesis
Source: PubMed Central journal article supplement — iScience. 2024 Jan 23;27(3):108991. doi: 10.1016/j.isci.2024.108991 (PMC10879712; doi:10.1016/j.isci.2024.108991), 2024-01-23
Supplement: mmc2.pdf [file mmc2.pdf]

## **GpCRC Credit roster**

### **Members of the Gastroparesis Clinical Research Consortium as of June 2020:**

#### **Adult Clinical Centers:**

##### **Johns Hopkins University, Baltimore, MD:**

Robert Bulat, MD (Co-Investigator); Robert Burns; Guillermo Barahona Hernandez, Megan McKnight

**Mayo Clinic, Scottsdale, AZ:** Pankaj Jay Pasricha, MD (Principal Investigator)

**Massachusetts General Hospital, Boston, MA:** Braden Kuo, MD, MSc (Principal Investigator); April Mendez; Kyle Staller, MD; Andrea Thurler, NP, Christopher Velez, MD, Casey Silvernale

**Temple University, Philadelphia, PA:** Henry P. Parkman, MD (Principal Investigator); Zubair Malik, MD; Alan Maurer, MD; Amiya Palit, MD

**Texas Tech University Health Sciences Center, El Paso, TX:** Richard W. McCallum, MD (Principal Investigator); Irene Sarosiek, MD (Principal Investigator); Natalia Vega, CCRC; Denise Vasquez; Sean Connery, Karina Espino, Marvin Friedman, PhD (Mount Sinai)

**University of Louisville, Louisville, KY:** T Thomas Abell, MD (Principal Investigator); Abigail Stocker, MD (Co-Investigator); Bridget Cannon, RN; Lindsay McElmurray, PA-C, Kelly Cooper, NP, Catherine McBride

**Wake Forest University, Winston-Salem, NC:** Kenneth Koch, MD (Principal Investigator); Lynn Baxter; Anya Brown; Paula Stuart, PA; Amirah Abdullah

#### **Pediatric Clinical Centers:**

**Baylor College of Medicine, Houston, TX:** Robert Shulman, MD (Principal Investigator); Bruno Chumpitazi, MD (Co-Investigator); Liz Febo-Rodriguez, MD, John Hollier, MD, Cynthia Bouette; Heather Charron

**Boston Children's Hospital, Boston, MA:** Samuel Nurko, MD (Site Principal Investigator); Stephanie Wall, Madeline Kane

**Nationwide Children's Hospital, Columbus, OH:** Kent Williams, MD (Site Principal Investigator); Lina Yossef-Salameh; Frederick Woodley

#### **Resource Centers:**

##### **Pathology Resource Center:**

**Mayo Clinic College of Medicine, Rochester, MN:** Gianrico Farrugia, MD; Madhusudan Grover, MD (Co-Principal Investigators); Cheryl Bernard; Margaret Breen-Lyles, CRC

**National Institute of Diabetes, Digestive and Kidney Diseases, Bethesda, MD:** Jose Serrano, MD, PhD (Program Official); Frank Hamilton, MD, MPH (Project Scientist); Sherry Hall, MS; Stephen James, MD; Rebecca Torrance, RN MSN

**Scientific Data Research Center:**

**Johns Hopkins University, Bloomberg School of Public Health), Baltimore, MD:** James Tonascia, PhD (Principal Investigator); Margaret Adamo, BS; Patricia Belt, BS; John Dodge (2006-2018); Michele Donithan, MHS (2006-2017), MHS; Milana Isaacson, BS (2006-2018); Linda Lee, MD; Jill Meinert; Laura Miriel, BS; Emily Sharkey, BSN, MPH, MBA; Jacqueline Smith, AA; Michael Smith, BS; Alice Sternberg, ScM; Mark Van Natta, MHS; Annette Wagoner; Laura A Wilson, ScM; Goro Yamada PhD, MHS, MMS(2016-2019); Katherine P Yates, ScM

**Legacy Clinical Centers**

**California Pacific Medical Center, San Francisco, CA (2008-2017):** William Snape, MD (Principal Investigator); Nata DeVole, RN; Karen Earle, MD; Kjersti Kirkeby, MD; Candice Lee; Mimi Lin, MD; Doug Troyer, Anna von Bakonyi

**MetroHealth Medical Center, Cleveland, OH (2013-2016):** Jorge Calles-Escandon, MD (Principal Investigator)

**Stanford University, Stanford, CA (2008-2017):** Linda Nguyen, MD (Principal Investigator); Emerald Adler, MD; Chiara Orlando

**University of Michigan, Ann Arbor, MI (2006-2017):** William Hasler, MD (Principal Investigator); William Herman, MD; Andrew Kraftson, MD; Amy E. Rothberg, MD; Sophanara Wootten
